# Supplementary material for: Revealing the role of intrinsic point defects in the stability of halide double perovskite Cs2AgBiBr6
Source: Royal Society of Chemistry journal article supplement (doi:10.1039/d4cc05961a), 2025-01-01
Supplement: d4cc05961a2.pdf [file d4cc05961a2.pdf]

# Electronic Supplementary Information – Revealing the role of intrinsic point defects in stability of halide double perovskite Cs<sub>2</sub>AgBiBr<sub>6</sub>

Il-Chol Ri, Chun-Son Ri, Song-Hyon Yu, Son-Hyok Jo, Song-Hyok Choe, Chol-Jun Yu\*

Chair of Computational Materials Design (CMD), Faculty of Materials Science, Kim Il Sung University,  
Ryongnam-Dong, Taesong District, Pyongyang, PO Box 76, Democratic People's Republic of Korea

## Computational detail for defect

The pseudopotential plane wave method was adopted, as implemented in the Quantum ESPRESSO package [1]. Primitive unit cell of cubic Cs<sub>2</sub>AgBiBr<sub>6</sub>, containing 10 atoms, was used for electronic structure calculations with the (6 × 6 × 6) *k*-points and HSE06 hybrid exchange-correlation functional [2]. For defective systems, we constructed 3 × 3 × 3 supercells (270 atoms) and performed atomic relaxations with an atomic force threshold of 5 × 10<sup>-4</sup> Ry/Bohr using the  $\Gamma$  point and PBE functional [3]. Based on the PBE-optimized supercells, we finally performed the self-consistent field (SCF) calculations using the HSE06 functional to get the total energy. We note that the PBE calculations provide sufficiently accurate results on forces, structures, and band dispersion, but underestimates band gaps. Therefore, this method was proved to be a reliable method to balance the computational cost and the calculation accuracy. The kinetic cut-off energies were 50 and 500 Ry for wave functions and electron density, respectively. The formation energies of the intrinsic point defects were evaluated under the chemical potential conditions [4]. Computational details are provided in the supplementary material. Then, we used 2 × 2 × 2 supercells for vacancy-mediated ion migrations, for which the activation energies were determined by applying the nudged elastic band (NEB) method [5].

The formation energy of defect *X* with charge state *q* is calculated as follows,

$$E_f(X^q) = E_{\text{tot}}(X^q) - E_{\text{tot}}(\text{perf}) + \sum_i n_i \mu_i + q(\mu_e + E_{\text{VBM}}) + E_{\text{corr}}^q, \quad (\text{S1})$$

where  $E_{\text{tot}}(X^q)$  and  $E_{\text{tot}}(\text{perf})$  are the total energies of the defect and perfect supercells, and  $n_i$  and  $\mu_i$  indicate the number of atoms added into ( $n_i < 0$ ) or removed from ( $n_i > 0$ ) the perfect supercell and the atomic chemical potential of species *i*.  $\mu_e$  is the electronic chemical potential or the Fermi level, *i.e.*, the energy of the electron reservoir, and is referenced to the valence band maximum (VBM) energy  $E_{\text{VBM}}$ , thereby changing from 0 to the band gap  $E_g$  of the perfect bulk. The correction term  $E_{\text{corr}}^q$  denotes the effect of finite size of periodic supercells on the total energy of the charged defect supercell, and can be calculated within the monopole approximation by  $E_{\text{corr}}^q \approx \alpha q^2 / \epsilon L$ , where  $\epsilon$  is the static dielectric constant,  $\alpha$  the Madelung constant and  $L$  the lattice constant [6, 7].

Once the formation energy of the defect is calculated, the concentration of the defect *X* in thermal equilibrium can be determined at temperature *T* by the following relation [4],

$$c(X) = N_{\text{sites}} N_{\text{conf}} \exp\left(\frac{-E_f(X)}{k_B T}\right), \quad (\text{S2})$$

where  $N_{\text{sites}}$  is the number of defect-incorporated sites in the lattice per unit cell volume, and  $N_{\text{conf}}$  is the number of equivalent configuration per site. It is clear that the lower formation energy could lead to higher concentration of defect.

The chemical potential  $\mu_i$ , representing the free energy required to exchange particles between the reservoir with infinite amounts of energy and particles and the corresponding system, can be defined as  $\mu_i = E_i^{\text{bulk}} + \Delta\mu_i$ , where  $E_i^{\text{bulk}}$  is the total energy of the elementary bulk solid per atom. For the Cs<sub>2</sub>AgBiBr<sub>6</sub> compound under study, the reservoir solid materials are referenced to *fcc* Cs metal (space group  $Fm\bar{3}m$ ), *fcc* Ag metal ( $Fm\bar{3}m$ ), trigonal Bi metal ( $R\bar{3}m$ ), and monoclinic Br solid ( $Cmca$ );

$$\Delta\mu_{\text{Cs}} = \mu_{\text{Cs}} - E_{\text{Cs}}^{\text{fcc}}, \quad \Delta\mu_{\text{Ag}} = \mu_{\text{Ag}} - E_{\text{Ag}}^{\text{fcc}}, \quad \Delta\mu_{\text{Bi}} = \mu_{\text{Bi}} - E_{\text{Bi}}^{\text{R}\bar{3}m}, \quad \Delta\mu_{\text{Br}} = \mu_{\text{Br}} - E_{\text{Br}}^{\text{Cmca}}. \quad (\text{S3})$$

The chemical potentials are not independent but variable, being required to meet the thermodynamic constraints related with the synthesis condition in experiment. Firstly, to avoid precipitating elementary bulk Cs, Ag, Bi and Br solid during the synthesis, the following inequalities should be satisfied;

$$\Delta\mu_{\text{Cs}} \leq 0, \quad \Delta\mu_{\text{Ag}} \leq 0, \quad \Delta\mu_{\text{Bi}} \leq 0, \quad \Delta\mu_{\text{Br}} \leq 0. \quad (\text{S4})$$

These sets an upper bound on the chemical potentials. Secondly, the competing binary compounds A<sub>x</sub>B<sub>y</sub> (A, B = Cs, Ag, Bi, Br) should not be formed as well, requiring the chemical potentials to meet the following constraint,

\*Corresponding author: Chol-Jun Yu, Email: cj.yu@ryongnamsan.edu.kp

$$x\Delta\mu_A + y\Delta\mu_B \leq \Delta H_f(A_xB_y) \approx E_{A_xB_y}^{\text{bulk}} - (xE_A^{\text{bulk}} + yE_B^{\text{bulk}}), \quad (\text{S5})$$

where  $\Delta H_f(A_xB_y)$  is the formation enthalpy that can be approximated to be the DFT total energy difference while ignoring the negligible entropic and volumetric contributions. Thirdly, the formation of ternary compounds  $A_xB_yC_z$  should also be prevented, leading the following constraints,

$$x\Delta\mu_A + y\Delta\mu_B + z\Delta\mu_C \leq \Delta H_f(A_xB_yC_z) \approx E_{A_xB_yC_z}^{\text{bulk}} - (xE_A^{\text{bulk}} + yE_B^{\text{bulk}} + zE_C^{\text{bulk}}). \quad (\text{S6})$$

Lastly, stable existence of  $\text{Cs}_2\text{AgBiBr}_6$  requires the following equation;

$$2\Delta\mu_{\text{Cs}} + \Delta\mu_{\text{Ag}} + \Delta\mu_{\text{Bi}} + 6\Delta\mu_{\text{Br}} = \Delta H_f(\text{Cs}_2\text{AgBiBr}_6) \approx E_{\text{Cs}_2\text{AgBiBr}_6}^{\text{Fm}\bar{3}m} - (2E_{\text{Cs}}^{\text{fcc}} + E_{\text{Ag}}^{\text{fcc}} + E_{\text{Bi}}^{\text{R}\bar{3}m} + E_{\text{Br}}^{\text{Cmca}}). \quad (\text{S7})$$

This gives a lower bound on the chemical potentials. All these constraints can determine the range of Cs, Ag, Bi and Br chemical potentials in which the host compound  $\text{Cs}_2\text{AgBiBr}_6$  is thermodynamically stable.

The Fermi level  $\mu_e$ , *i.e.*, the electronic chemical potential, is not a free parameter as well. In fact, Eqs. (S1) and (S2) can be formed for all intrinsic defects and impurities in the compound. Then, the equations should be solved in a self-consistent way with the charge neutrality condition for free electrons in the conduction bands and free holes in the valence bands as follows,

$$\sum_i c_i q_i - n_e + n_h = 0, \quad (\text{S8})$$

where  $c_i$  and  $q_i$  are the concentration and charge of defect or impurity, and  $n_e$  and  $n_h$  are the concentrations of free electrons and free holes, respectively.

The lattice vectors and positions of atoms in the unit cell of  $\text{Cs}_2\text{AgBiBr}_6$  are provided in Table S4. The typical input file of pw.x code for atomic relaxations in the supercell is provided below.

```
&CONTROL
  calculation = 'relax',
  restart_mode = 'from_scratch',
  outdir = 'relax',
  prefix = 'relax',
  pseudo_dir = '/home/pub/pseudo/upf_files/gbrv/',
  forc_conv_thr = 5.0D-4,
  nstep = 200,
  tstress = .true.,
  tprnfor = .true.,
/
&SYSTEM
 ibrav = 0, celldm(1) = 1.889726342,
  ntyp = 4, nat = 269,
  ecutwfc = 50, ecutrho = 500,
  input_dft = 'PBE',
  tot_charge = +2,
  occupations = 'smearing', smearing = 'm-p', degauss = 0.02
/
&electrons
  electron_maxstep = 100,
  conv_thr = 1.0d-7,
  mixing_beta = 0.7
/
&ions
  ion_dynamics = 'bfgs',
/
ATOMIC_SPECIES
Cs 132.906 cs_pbe_v1.uspp.F.UPF
Bi 208.980 bi_pbe_v1.uspp.F.UPF
Ag 107.868 ag_pbe_v1.4.uspp.F.UPF
Br 79.904 br_pbe_v1.4.uspp.F.UPF

K_POINTS {automatic}
2 2 2 1 1 1

CELL_PARAMETERS (alat= 1.0)
24.33769989 0.00000000 0.00000000
```

|             |             |             |
|-------------|-------------|-------------|
| 12.16884994 | 21.07706637 | 0.00000000  |
| 12.16884994 | 7.02568879  | 19.87164875 |

ATOMIC\_POSITIONS (crystal)

...

For the SCF calculations of relaxed structure, the XC functional *PBE* is changed to *HSE* and the k-point setting is changed to “*K\_POINTS gamma*”. The typical input file of *neb.x* code for NEB simulation is as follow.

```

BEGIN
BEGIN_PATH_INPUT
&PATH
  restart_mode      = 'restart'
  string_method     = 'neb',
  nstep_path        = 2000,
  ds                = 1.D0,
  opt_scheme        = 'broyden',
  num_of_images     = 7,
  k_max             = 0.3D0,
  k_min             = 0.2D0,
  path_thr          = 0.05D0,
  minimum_image     = .true.,
  CI_scheme         = 'auto',
  first_last_opt    = .false.,
  use_freezing      = .true.
/
CLIMBING_IMAGES
4
END_PATH_INPUT

BEGIN_ENGINE_INPUT
&CONTROL
  prefix           = 'agmig'
  pseudo_dir       = '/home/pub/pseudo/upf_files/gbrv/',
/
&SYSTEM
  ibrav = 0,
  celldm(1) = 1.889726342,
  ntyp = 4, nat = 268,
  ecutwfc = 50, ecutrho = 500,
  input_dft = 'PBE',
  occupations = 'smearing', smearing = 'm-p', degauss = 0.02
/
&electrons
  electron_maxstep = 100,
  conv_thr = 1.0d-7,
  mixing_beta = 0.7
/

ATOMIC_SPECIES
Cs 132.906 cs_pbe_v1.uspp.F.UPF
Bi 208.980 bi_pbe_v1.uspp.F.UPF
Ag 107.868 ag_pbe_v1.4.uspp.F.UPF
Br 79.904 br_pbe_v1.4.uspp.F.UPF

CELL_PARAMETERS (alat= 1.0)
24.33769989 0.00000000 0.00000000
12.16884994 21.07706637 0.00000000
12.16884994 7.02568879 19.87164875

K_POINTS gamma

BEGIN_POSITIONS

```

```

FIRST_IMAGE
ATOMIC_POSITIONS (crystal)
...
LAST_IMAGE
ATOMIC_POSITIONS (crystal)
...
END_POSITIONS

END_ENGINE_INPUT
END

```

The atomic positions in the supercells are provided as separate files (cif).

## Tables and figures for additional data

Table S1. Ultrasoft pseudopotentials from GBRV library [8] with valence electron configuration for elements and the structural phase and binding energy per atom ( $E_b$ ) in their simple substances.

| Element | Pseudopotential        | Configuration         | Structure (space group)     | $E_b$ (eV/atom) |
|---------|------------------------|-----------------------|-----------------------------|-----------------|
| Cs      | cs_pbe_v1.uspp.F.UPF   | $5s^25p^66s^1$        | <i>fcc</i> ( $Fm\bar{3}m$ ) | -5.0618 (-5.12) |
| Ag      | ag_pbe_v1.4.uspp.F.UPF | $4s^24p^64d^{10}5s^1$ | <i>fcc</i> ( $Fm\bar{3}m$ ) | -1.9267         |
| Bi      | bi_pbe_v1.uspp.F.UPF   | $5d^{10}6s^26p^3$     | trigonal ( $R\bar{3}m$ )    | -1.3131         |
| Br      | br_pbe_v1.4.uspp.F.UPF | $4s^24p^5$            | orthorhombic ( $Cmca$ )     | -1.0667         |

Table S2. ICSD number, space group and formation energies  $E_f$  of all competing binary and ternary compounds in comparison with those from the Materials Project (MP) [11] for the quaternary Cs-Ag-Bi-Br system.

| Compound                                        | ICSD   | Space group   | $E_f$ (eV/atom) |        |
|-------------------------------------------------|--------|---------------|-----------------|--------|
|                                                 |        |               | This work       | MP     |
| Cs <sub>3</sub> Bi                              | 58769  | $Fm\bar{3}m$  | -0.324          | -0.466 |
| Cs <sub>3</sub> Bi <sub>2</sub>                 | 240017 | $C12/c1$      | -0.366          | -0.491 |
| Cs <sub>5</sub> Bi <sub>4</sub>                 | 240005 | $C12/m1$      | -0.395          | -      |
| CsBi                                            | 55067  | $P121/C1$     | -0.368          | -0.511 |
| CsBi <sub>2</sub>                               | 58771  | $Fd\bar{3}ms$ | -0.316          | -0.390 |
| CsBr                                            | 22174  | $Pm\bar{3}m$  | -1.803          | -2.014 |
| CsBr                                            | 61516  | $Fm\bar{3}m$  | -1.778          | -2.009 |
| CsBr <sub>3</sub>                               | 22130  | $Pmnb$        | -0.990          | -1.098 |
| Ag <sub>3</sub> Bi                              | 104389 | $Fm\bar{3}m$  | 0.072           | 0.147  |
| AgBi                                            | 104390 | $P63/mmc$     | 0.152           | -      |
| AgBr                                            | 65061  | $Fm\bar{3}m$  | -0.341          | -0.451 |
| AgBr                                            | 56549  | $P121/m1$     | -0.342          | -0.409 |
| BiBr                                            | 1560   | $C12/m1$      | -0.497          | -0.743 |
| BiBr <sub>3</sub>                               | 100294 | $C12/m1$      | -0.777          | -1.170 |
| BiBr <sub>3</sub>                               | 100293 | $P121/a1$     | -0.747          | -1.111 |
| CsAgBr <sub>2</sub>                             | 40480  | $Ccmm$        | -1.103          | -      |
| CsAgBr <sub>2</sub>                             | 150301 | $Cmcm$        | -1.104          | -1.343 |
| CsAgBr <sub>2</sub>                             | 150302 | $P4/nmmz$     | -1.111          | -1.352 |
| Cs <sub>2</sub> AgBr <sub>3</sub>               | 150288 | $Pnma$        | -1.364          | -1.599 |
| Cs <sub>3</sub> Bi <sub>2</sub> Br <sub>9</sub> | 1142   | $P\bar{3}m1$  | -1.280          | -1.604 |
| Cs <sub>3</sub> Bi <sub>2</sub> Br <sub>9</sub> | 96723  | $C12/c1$      | -1.275          | -1.603 |
| Cs <sub>2</sub> AgBiBr <sub>6</sub>             | -      | $Fm\bar{3}m$  | -1.157          | -1.456 |

Table S3. Chemical potentials of elements according to the Br-rich, -moderate and -poor conditions (unit: eV).

| Condition   | Points | $\Delta\mu_{\text{Br}}$ | $\Delta\mu_{\text{Cs}}$ | $\Delta\mu_{\text{Ag}}$ | $\Delta\mu_{\text{Bi}}$ |
|-------------|--------|-------------------------|-------------------------|-------------------------|-------------------------|
| Br-rich     | A      | -0.1                    | -3.738                  | -0.588                  | -2.905                  |
|             | B      | -0.1                    | -3.685                  | -0.588                  | -3.011                  |
|             | C      | -0.1                    | -3.685                  | -0.616                  | -2.983                  |
| Br-moderate | A      | -0.3                    | -3.540                  | -0.386                  | -2.303                  |
|             | B      | -0.3                    | -3.447                  | -0.386                  | -2.489                  |
|             | C      | -0.3                    | -3.416                  | -0.447                  | -2.490                  |
| Br-poor     | A      | -0.6                    | -3.238                  | -0.086                  | -1.407                  |
|             | B      | -0.6                    | -3.147                  | -0.086                  | -1.589                  |
|             | C      | -0.6                    | -3.116                  | -0.149                  | -1.588                  |

Table S4. Lattice vectors  $a$ ,  $b$  and  $c$  in Å unit and positions of atoms in crystal coordinates in the primitive unit cell of  $\text{Cs}_2\text{AgBiBr}_6$ .

|     | $x$        | $y$        | $z$        |
|-----|------------|------------|------------|
| $a$ | 8.11257168 | 0.00000000 | 0.00000000 |
| $b$ | 4.05628584 | 7.02569316 | 0.00000000 |
| $c$ | 4.05628584 | 2.34189772 | 6.62484787 |
| Cs  | 0.25       | 0.25       | 0.25       |
| Cs  | 0.75       | 0.75       | 0.75       |
| Ag  | 0.50       | 0.50       | 0.50       |
| Bi  | 0.00       | 0.00       | 0.00       |
| Br  | 0.74865495 | 0.25132380 | 0.25136631 |
| Br  | 0.25134505 | 0.74867620 | 0.74863369 |
| Br  | 0.25132380 | 0.74865495 | 0.25136631 |
| Br  | 0.74867620 | 0.25134505 | 0.74863369 |
| Br  | 0.25134505 | 0.25134505 | 0.74863369 |
| Br  | 0.74865495 | 0.74865495 | 0.25136631 |

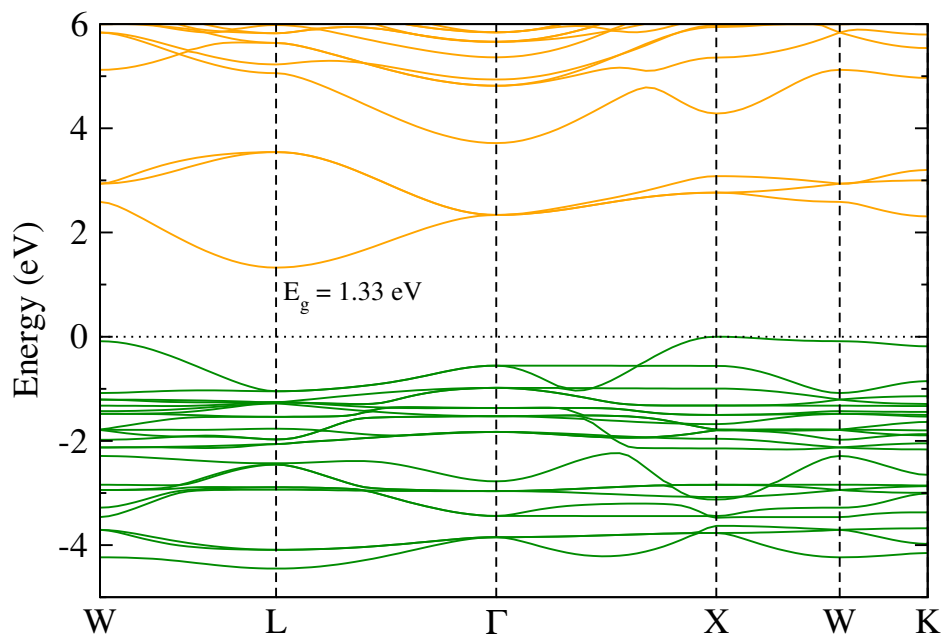

Fig. S1 The electronic band structure calculated by using the PBE exchange-correlation functional.

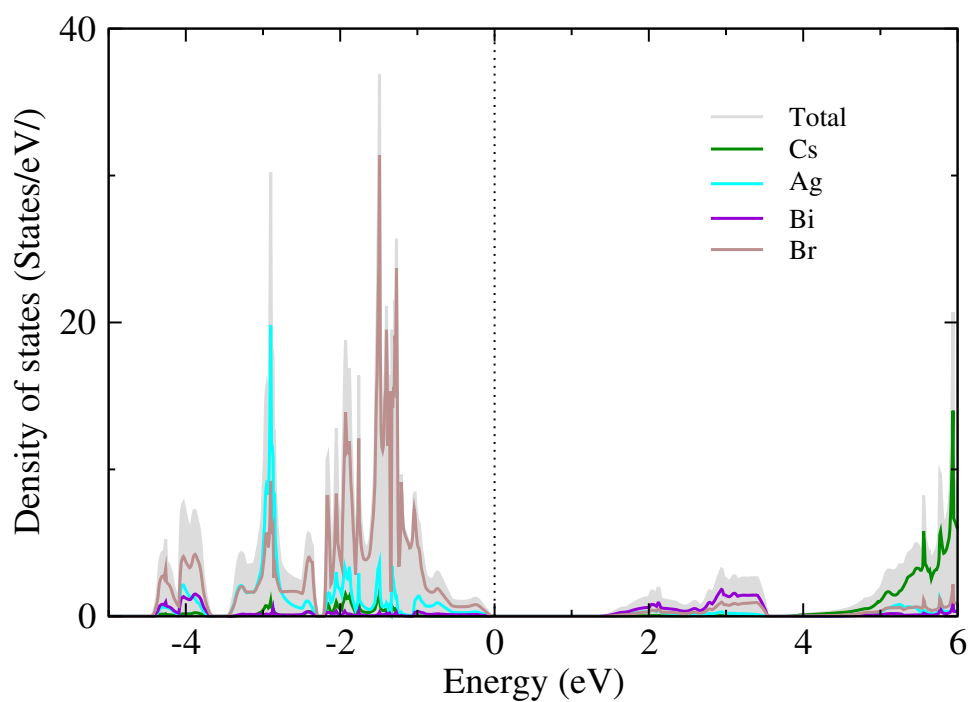

Fig. S2 The total density of states calculated by using the PBE exchange-correlation functional.

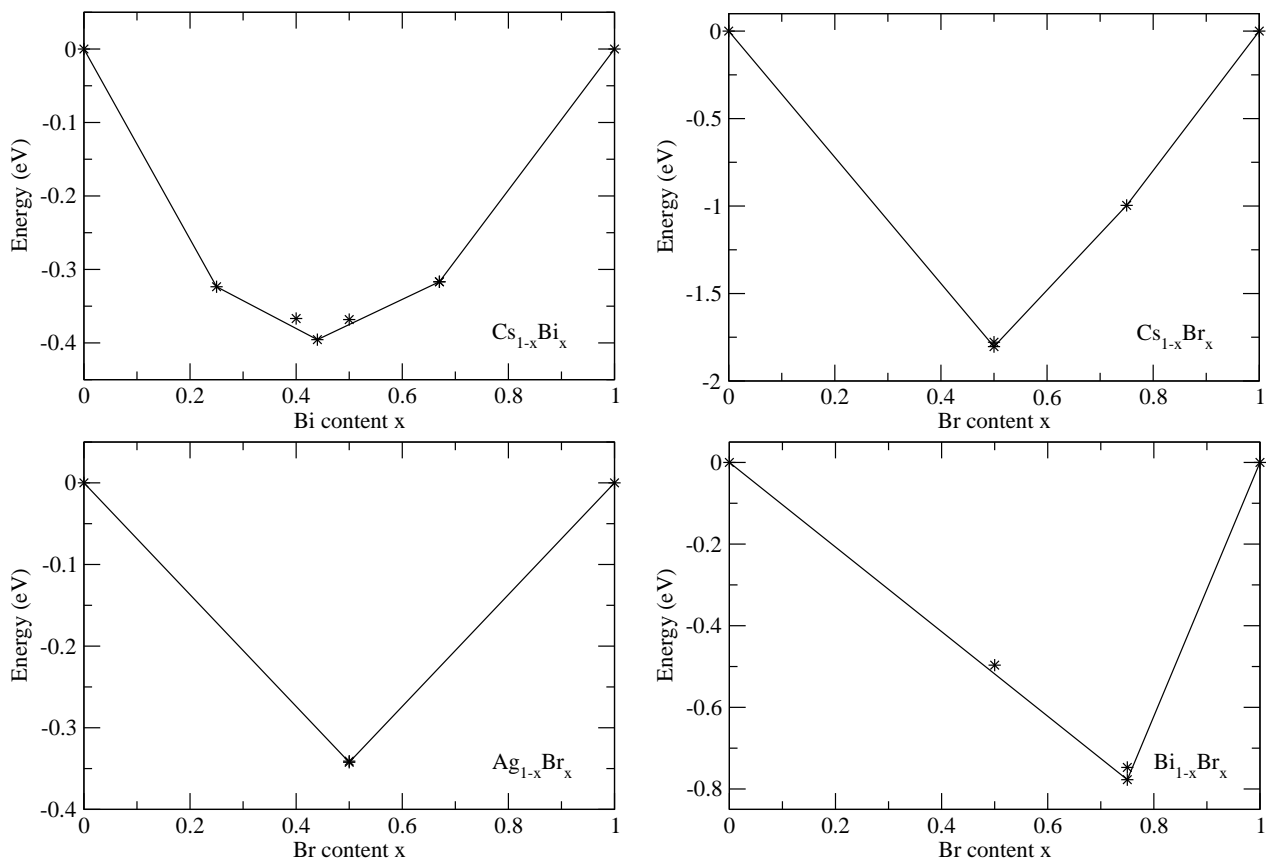

Fig. S3 Convex hull plots for the binary systems of Cs-Bi, Cs-Br, Ag-Br and Bi-Br.

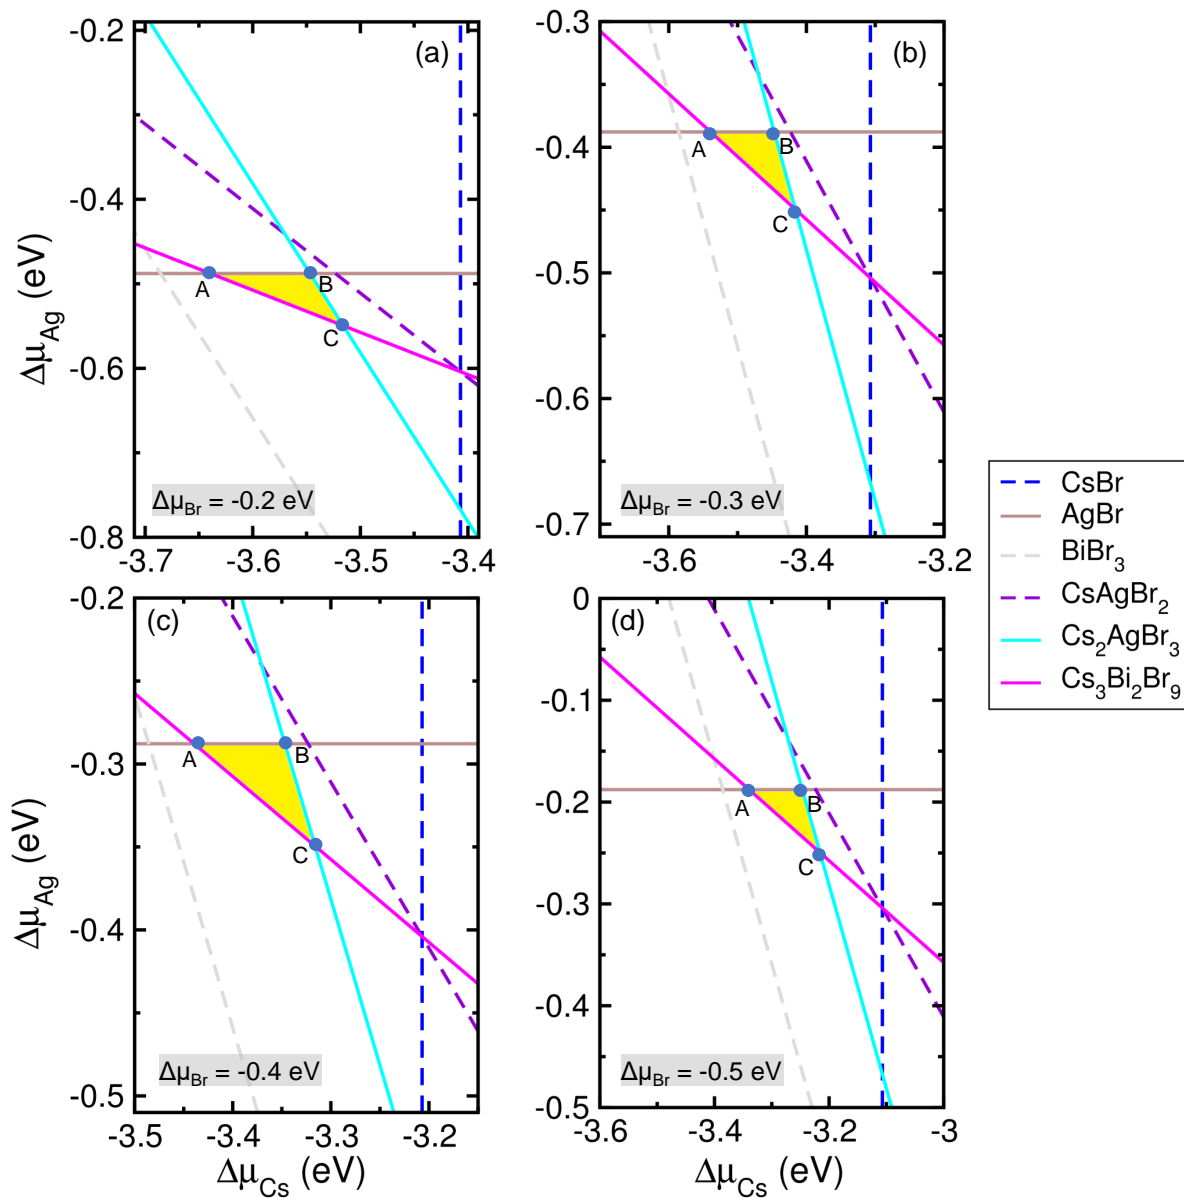

Fig. S4 Chemical potential regions of elements for stable formation of  $\text{Cs}_2\text{AgBiBr}_6$  depicted by yellow-coloured triangle for (a)  $\Delta\mu_{\text{Br}} = -0.2$  eV, (b)  $\Delta\mu_{\text{Br}} = -0.3$  eV, (c)  $\Delta\mu_{\text{Br}} = -0.4$  eV and (d)  $\Delta\mu_{\text{Br}} = -0.5$  eV.



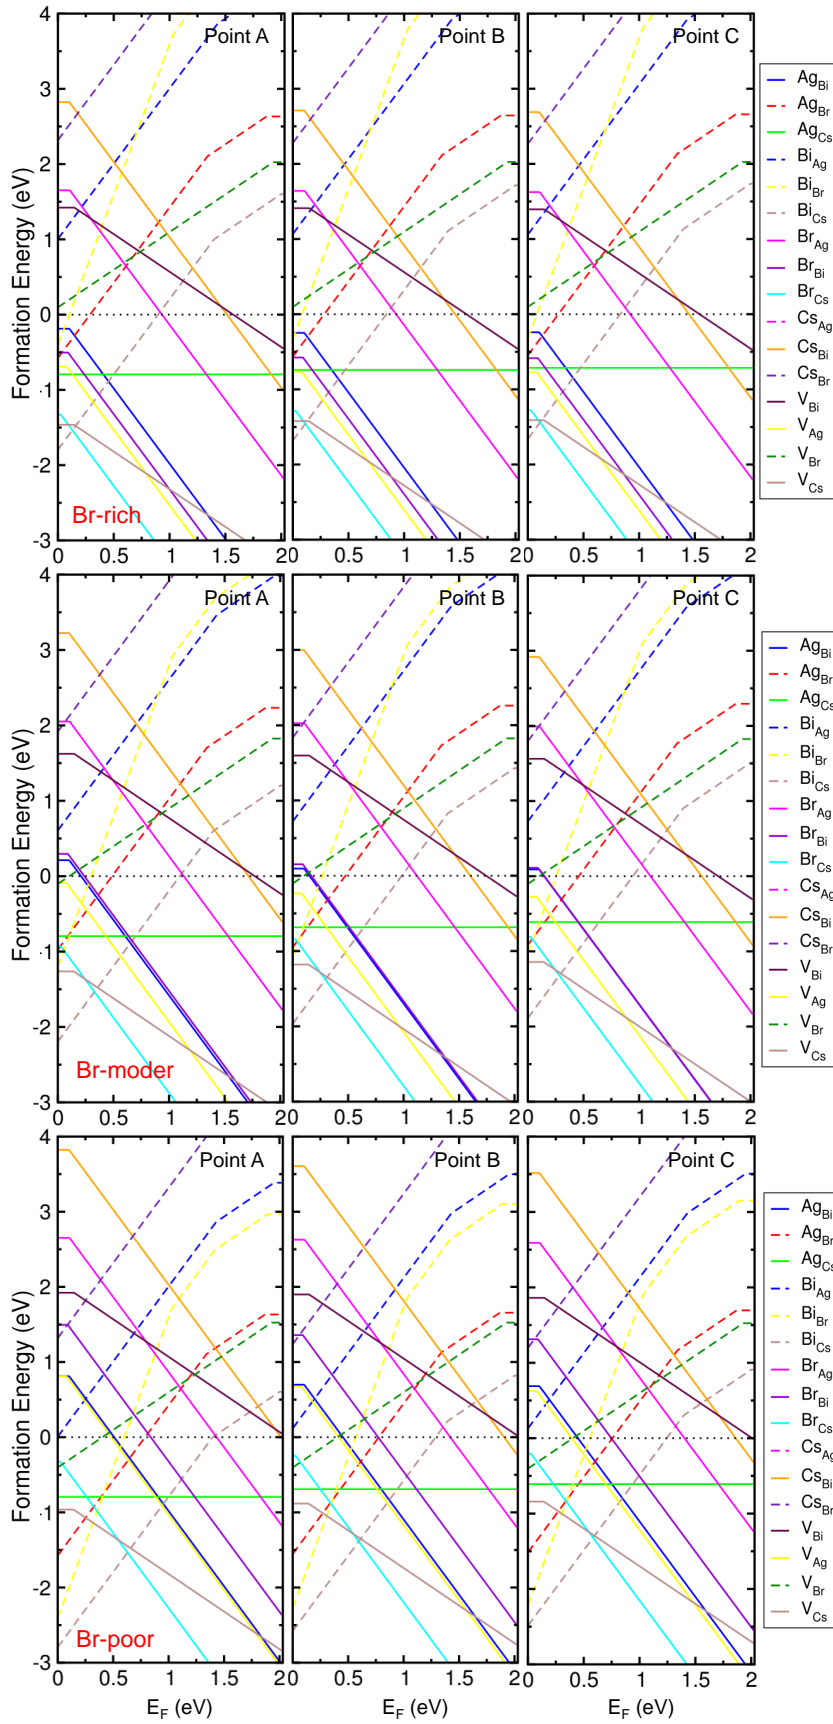

Fig. S5 Formation energies of donor-type (dashed line) and acceptor-type (solid line) defects under Br-rich (top,  $\Delta\mu_{\text{Br}} = -0.1$  eV), Br-moderate (middle,  $\Delta\mu_{\text{Br}} = -0.3$  eV) and Br-poor (bottom,  $\Delta\mu_{\text{Br}} = -0.6$  eV) conditions. The left, centre and right panels shows the formation energies obtained at A, B and C points respectively, as indicated in Fig. S4, which correspond to Cs-poor, Cs-moderate and Cs-rich conditions. Meanwhile, the A and B points correspond to Ag-rich condition, and the C point indicates the Ag-poor condition.

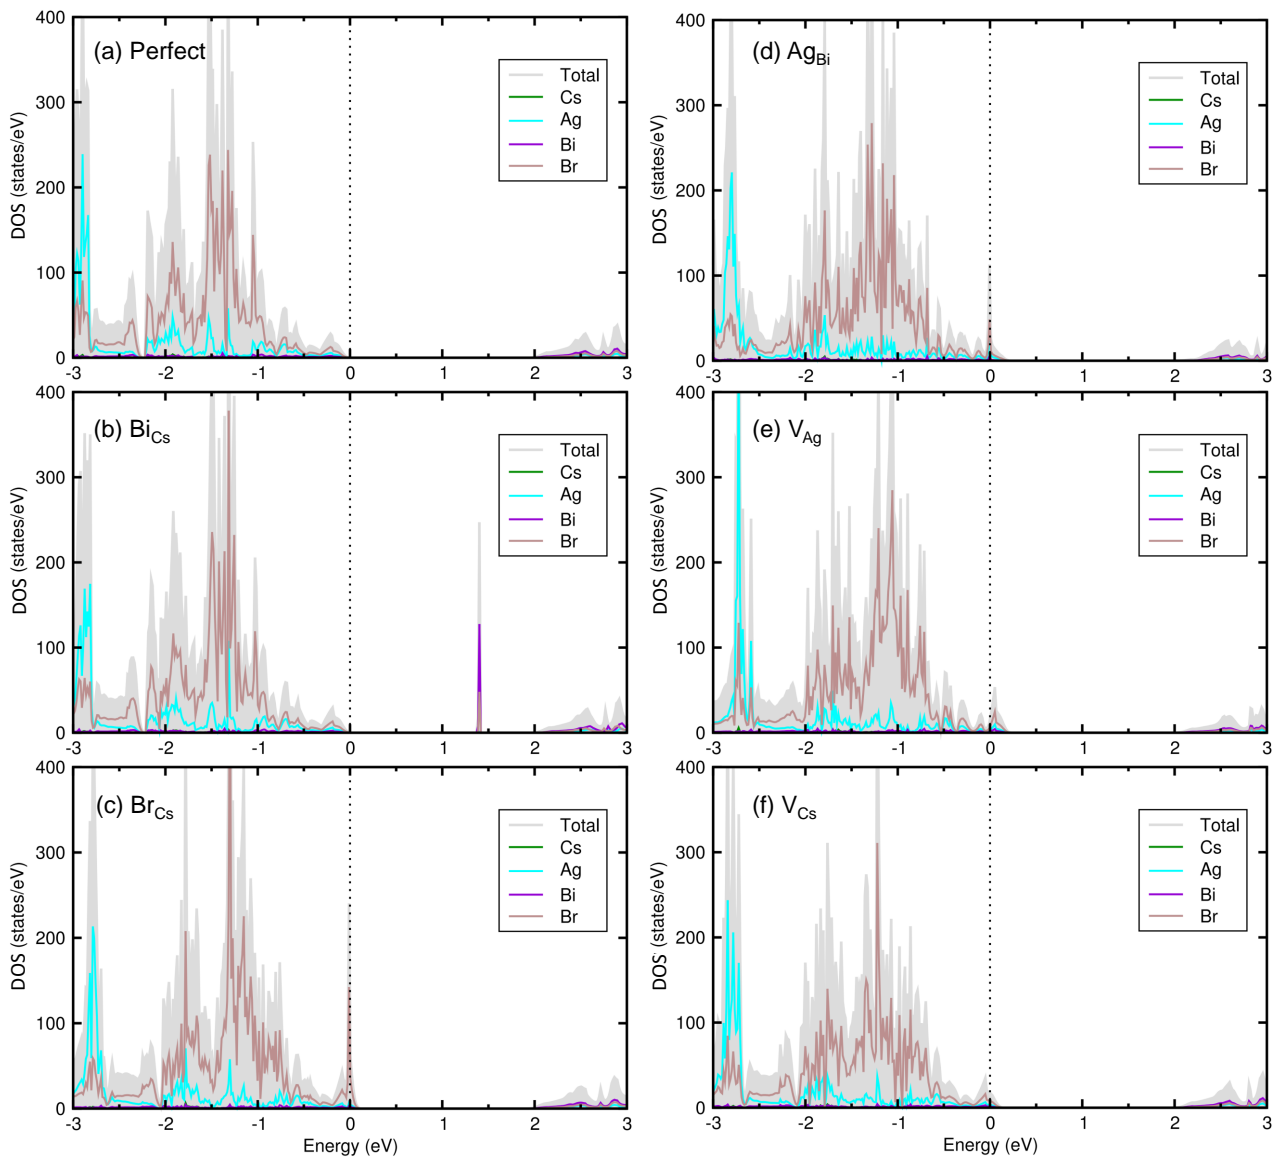

Fig. S6 Density of states (DOS) in supercells of (a) perfect system and defective systems with low formation energy defect, such as (b)  $\text{Bi}_{\text{Cs}}$ , (c)  $\text{Br}_{\text{Cs}}$ , (d)  $\text{Ag}_{\text{Bi}}$ , (e)  $\text{V}_{\text{Ag}}$  and (f)  $\text{V}_{\text{Cs}}$ . The Fermi energy is set to zero indicated by dotted vertical line. The  $\text{Bi}_{\text{Cs}}$  defective system shows the donor state at 1.4 eV, which is mainly contributed from Bi 6*p* state. Other defects, such as  $\text{Br}_{\text{Cs}}$ ,  $\text{Ag}_{\text{Bi}}$ ,  $\text{V}_{\text{Ag}}$  and  $\text{V}_{\text{Cs}}$ , are acceptor-type, showing the characteristic electronic states near the Fermi level (0 eV).

## References

- [1] P. Giannozzi, S. Baroni, N. Bonini, M. Calandra, R. Car, C. Cavazzoni, D. Ceresoli, G. L. Chiarotti, M. Cococcioni, I. Dabo, et al., QUANTUM ESPRESSO: A modular and open-source software project for quantum simulations of materials, *J. Phys.: Cond. Matter*, 2009, **21**, 395502.
- [2] J. Heyd, G. E. Scuseria and M. Ernzerhof, Hybrid functionals based on a screened coulomb potential, *J. Chem. Phys.*, 2003, **118**, 8207.
- [3] J. P. Perdew, K. Burke and M. Ernzerhof, Generalized gradient approximation made simple, *Phys. Rev. Lett.*, 1996, **77**, 3865.
- [4] C. Freysoldt, B. Grabowski, T. Hickel, J. Neugebauer, G. Kresse, A. Janotti and C. G. Van de Walle, First-principles calculations for point defects in solids, *Rev. Mod. Phys.*, 2014, **86**, 253–305.
- [5] G. Henkelman, B. P. Uberuaga, and H. Jonsson, A climbing image nudged elastic band method for finding saddle points and minimum energy paths, *J. Chem. Phys.*, 2000, **113**, 9901.
- [6] G. Makov and M. C. Payne, Periodic boundary conditions in ab initio calculations, *Phys. Rev. B*, 1995, **51**, 4014.
- [7] C. Freysoldt, J. Neugebauer and C. G. Van de Walle, Fully ab initio finite-size corrections for charged-defect supercell calculations, *Phys. Rev. Lett.*, 2009, **102**, 016402.
- [8] K. F. Garrity, J. W. Bennet, K. M. Rabe and D. Vanderbilt, Pseudopotentials for high-throughput DFT Calculations, *Comput. Mater. Sci.*, 2014, **81**, 446–452.
- [9] M. W. Chase, Jr., *NIST-JANAF Thermochemical Tables*, Fourth Edition (J. Phys. Chem. Ref. Data, Monograph 9, 1998) pp. 11951.
- [10] *CRC Handbook of Chemistry and Physics*, Internet Version, D. R. Lide Ed.; CRC Press: <http://www.hbcnpnetbase.com>, Boca Raton, FL (2005).
- [11] A. Jain, S. P. Ong, G. Hautier, W. Chen, W. D. Richards, S. Dacek, S. Cholia, D. Gunter, D. Skinner, G. Ceder and K. A. Persson, The Materials Project: A materials genome approach to accelerating materials innovation, *APL Mater.*, 2013, **1**, 011002.
